# Supplementary material for: PTMA, a new identified autoantigen for oral submucous fibrosis, regulates oral submucous fibroblast proliferation and extracellular matrix
Source: PubMed Central journal article supplement (PMC5650380; doi:10.18632/oncotarget.20419), 2017-08-24
Supplement: oncotarget-08-74806-s001.pdf [file oncotarget-08-74806-s001.pdf]

# PTMA, a new identified autoantigen for oral submucous fibrosis, regulates oral submucous fibroblast proliferation and extracellular matrix

## SUPPLEMENTARY MATERIALS

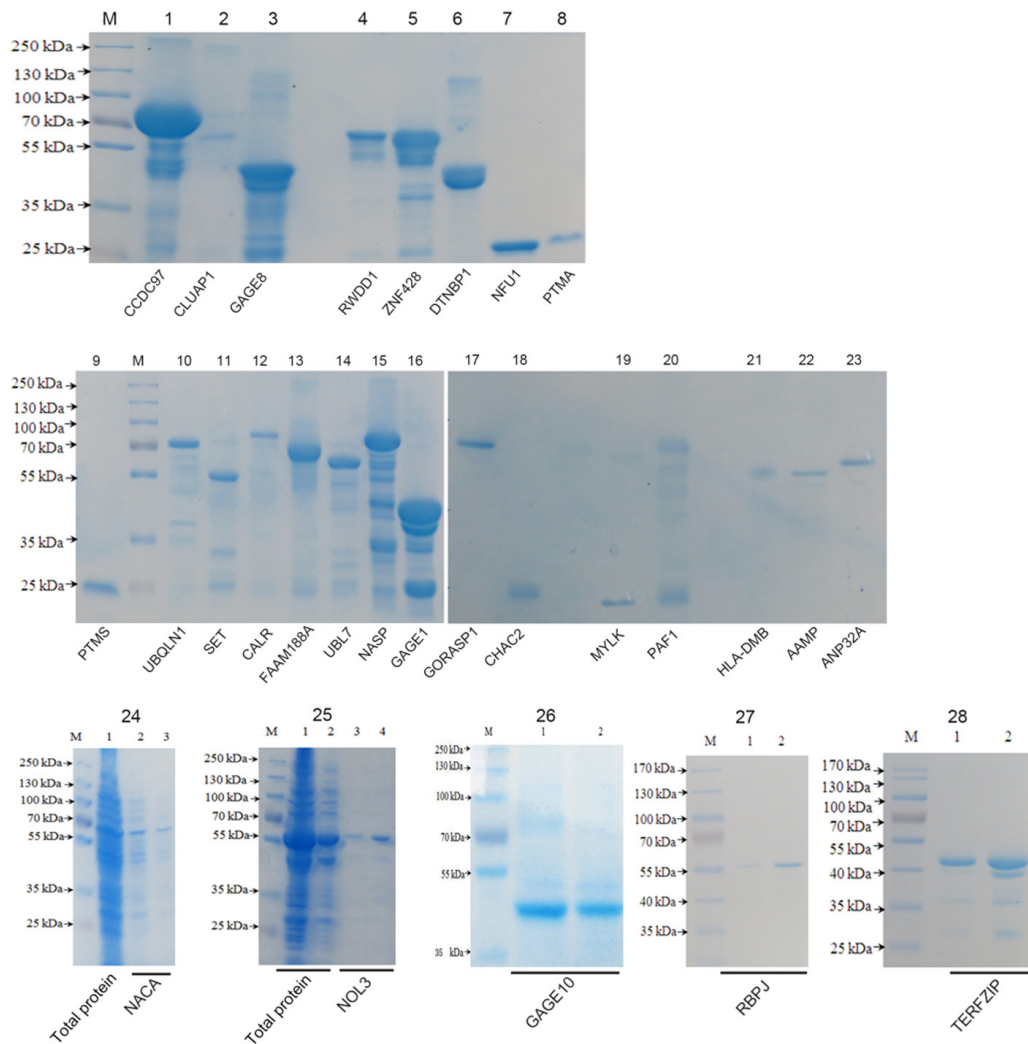

Supplementary Figure 1: SDS-PAGE analysis of the 28 prokaryotic expressed and purified OSF-associated autoantigen proteins.

**Supplementary Table 1: Detail information for 45 identified OSF-associated autoantigens.**

See Supplementary File 1

**Supplementary Table 2: Primer sequence**

| Gene       | Forward                | Reverse                  |
|------------|------------------------|--------------------------|
| GORASP1    | TGAAGGCACTACTGAAAGCCA  | CCAACCACATAGTCTGTGTAGGG  |
| CALR       | CCTGCCGTCTACTTCAAGGAG  | GAACTTGCCGGAAGTGAAGAAC   |
| PTMA       | TCAGACGCAGCCGTAGACA    | GCATTCCCGTTAGCAGGGG      |
| NOL3       | GACCGCAGCTATGACCCCTC   | CTCCGGTTCAGCCTCTTTAGA    |
| AAMP       | CGAGGTGGTAGAACTTGATCCC | GATGCTGAGTGCAATGCAAAG    |
| ZNF48      | TGATTGCGGCAAGAGGTTTGT  | GCGGAGGTGTTTGACTCGG      |
| NASP       | AGATTGGGAACCTAGAGCTTGC | ACTTCTCCGAGTTTAAGATGTGC  |
| DTNBP1     | GAGCTGGTGGATAGCGAGG    | AGTCTGCGATTAAAGCTGGGA    |
| TGFβ1      | GGCCAGATCCTGTCCAAGC    | GTGGGTTTCCACCATTAGCAC    |
| SMAD4      | CTCATGTGATCTATGCCCGTC  | AGGTGATACAACTCGTTTCGTAGT |
| Collagen I | GAGGGCCAAGACGAAGACATC  | CAGATCACGTCATCGCACAAAC   |
| β-actin    | CATGTACGTTGCTATCCAGGC  | CTCCTTAATGTACGCACGAT     |
